# Supplementary material
Source: PubMed Central journal article supplement (PMC8829572)
Supplement: mmc1.pdf [file mmc1.pdf]

## Supplementary Information

Table S1: Number of samples showing mutations in ORF3a protein

| Beginning of the table |                        |                        |                         |            |                        |                        |                         |
|------------------------|------------------------|------------------------|-------------------------|------------|------------------------|------------------------|-------------------------|
| position #             | # of Mutations (world) | # of Mutations (India) | % of occurrence (India) | position # | # of Mutations (world) | # of Mutations (India) | % of occurrence (India) |
| 1                      | 0                      | 0                      | -                       | 35         | 327                    | 1                      | 0.306                   |
| 2                      | 126                    | 0                      | 0                       | 36         | 166                    | 0                      | 0                       |
| 3                      | 23                     | 0                      | 0                       | 37         | 319                    | 0                      | 0                       |
| 4                      | 2                      | 0                      | 0                       | 38         | 1979                   | 0                      | 0                       |
| 5                      | 40                     | 3                      | 7.5                     | 39         | 512                    | 0                      | 0                       |
| 6                      | 68                     | 1                      | 1.471                   | 40         | 636                    | 1                      | 0.157                   |
| 7                      | 120                    | 0                      | 0                       | 41         | 735                    | 6                      | 0.816                   |
| 8                      | 13                     | 0                      | 0                       | 42         | 37308                  | 4                      | 0.011                   |
| 9                      | 87                     | 0                      | 0                       | 43         | 89                     | 0                      | 0                       |
| 10                     | 524                    | 0                      | 0                       | 44         | 583                    | 0                      | 0                       |
| 11                     | 61                     | 0                      | 0                       | 45         | 358                    | 1                      | 0.279                   |
| 12                     | 331                    | 0                      | 0                       | 46         | 299                    | 0                      | 0                       |
| 13                     | 516                    | 2                      | 0.388                   | 47         | 275                    | 0                      | 0                       |
| 14                     | 245                    | 0                      | 0                       | 48         | 170                    | 0                      | 0                       |
| 15                     | 6746                   | 6                      | 0.0889                  | 49         | 346                    | 0                      | 0                       |
| 16                     | 467                    | 3                      | 0.6423                  | 50         | 118                    | 1                      | 0.847                   |
| 17                     | 44                     | 0                      | 0                       | 51         | 186                    | 0                      | 0                       |
| 18                     | 566                    | 5                      | 0.883                   | 52         | 232                    | 10                     | 4.310                   |
| 19                     | 189                    | 1                      | 0.529                   | 53         | 582                    | 2                      | 0.344                   |
| 20                     | 189                    | 0                      | 0                       | 54         | 3442                   | 2                      | 0.058                   |
| 21                     | 903                    | 2                      | 0.221                   | 55         | 628                    | 4                      | 0.637                   |
| 22                     | 456                    | 3                      | 0.658                   | 56         | 52                     | 0                      | 0                       |
| 23                     | 1464                   | 2                      | 0.137                   | 57         | 155611                 | 471                    | 0.303                   |
| 24                     | 217                    | 0                      | 0                       | 58         | 1111                   | 1                      | 0.090                   |
| 25                     | 217                    | 0                      | 0                       | 59         | 530                    | 2                      | 0.377                   |
| 26                     | 28662                  | 396                    | 1.382                   | 60         | 866                    | 0                      | 0                       |
| 27                     | 2643                   | 0                      | 0                       | 61         | 63                     | 0                      | 0                       |
| 28                     | 123                    | 0                      | 0                       | 62         | 747                    | 0                      | 0                       |
| 29                     | 207                    | 0                      | 0                       | 63         | 313                    | 0                      | 0                       |
| 30                     | 177                    | 0                      | 0                       | 64         | 240                    | 0                      | 0                       |
| 31                     | 217                    | 0                      | 0                       | 65         | 346                    | 5                      | 1.445                   |
| 32                     | 468                    | 0                      | 0                       | 66         | 125                    | 1                      | 0.8                     |
| 33                     | 3529                   | 0                      | 0                       | 67         | 541                    | 0                      | 0                       |
| 34                     | 147                    | 0                      | 0                       | 68         | 1050                   | 0                      | 0                       |

| Continuation of Table 1 |                        |                        |                         |            |                        |                        |                         |
|-------------------------|------------------------|------------------------|-------------------------|------------|------------------------|------------------------|-------------------------|
| position #              | # of Mutations (world) | # of Mutations (India) | % of occurrence (India) | position # | # of Mutations (world) | # of Mutations (India) | % of occurrence (India) |
| 69                      | 1050                   | 0                      | 0                       | 109        | 57                     | 1                      | 1.754                   |
| 70                      | 35                     | 0                      | 0                       | 110        | 1243                   | 17                     | 1.368                   |
| 71                      | 69                     | 0                      | 0                       | 111        | 10                     | 0                      | 0                       |
| 72                      | 384                    | 1                      | 0.260                   | 112        | 817                    | 1                      | 0.122                   |
| 73                      | 549                    | 1                      | 0.182                   | 113        | 51                     | 0                      | 0                       |
| 74                      | 1459                   | 0                      | 0                       | 114        | 30                     | 0                      | 0                       |
| 75                      | 183                    | 0                      | 0                       | 115        | 18                     | 2                      | 11.11                   |
| 76                      | 58                     | 0                      | 0                       | 116        | 58                     | 0                      | 0                       |
| 77                      | 429                    | 5                      | 1.166                   | 117        | 24                     | 0                      | 0                       |
| 78                      | 1099                   | 0                      | 0                       | 118        | 91                     | 0                      | 0                       |
| 79                      | 10                     | 0                      | 0                       | 119        | 32                     | 0                      | 0                       |
| 80                      | 40                     | 3                      | 7.5                     | 120        | 36                     | 0                      | 0                       |
| 81                      | 102                    | 0                      | 0                       | 121        | 20                     | 0                      | 0                       |
| 82                      | 16                     | 0                      | 0                       | 122        | 101                    | 0                      | 0                       |
| 83                      | 185                    | 0                      | 0                       | 123        | 117                    | 0                      | 0                       |
| 84                      | 36                     | 0                      | 0                       | 124        | 66                     | 0                      | 0                       |
| 85                      | 719                    | 2                      | 0.278                   | 125        | 455                    | 13                     | 2.857                   |
| 86                      | 456                    | 1                      | 0.219                   | 126        | 245                    | 0                      | 0                       |
| 87                      | 29                     | 0                      | 0                       | 127        | 309                    | 0                      | 0                       |
| 88                      | 420                    | 2                      | 0.476                   | 128        | 463                    | 4                      | 0.864                   |
| 89                      | 1015                   | 1                      | 0.098                   | 129        | 365                    | 0                      | 0                       |
| 90                      | 1123                   | 0                      | 0                       | 130        | 25                     | 0                      | 0                       |
| 91                      | 11                     | 0                      | 0                       | 131        | 6122                   | 6                      | 0.098                   |
| 92                      | 663                    | 0                      | 0                       | 132        | 13                     | 0                      | 0                       |
| 93                      | 286                    | 16                     | 5.594                   | 133        | 14                     | 0                      | 0                       |
| 94                      | 413                    | 0                      | 0                       | 134        | 1513                   | 4                      | 0.264                   |
| 95                      | 265                    | 2                      | 0.755                   | 135        | 6                      | 0                      | 0                       |
| 96                      | 116                    | 0                      | 0                       | 136        | 40                     | 0                      | 0                       |
| 97                      | 239                    | 1                      | 0.418                   | 137        | 25                     | 1                      | 4                       |
| 98                      | 186                    | 0                      | 0                       | 138        | 3                      | 0                      | 0                       |
| 99                      | 1903                   | 0                      | 0                       | 139        | 10                     | 1                      | 10                      |
| 100                     | 3228                   | 2                      | 0.062                   | 140        | 521                    | 1                      | 0.192                   |
| 101                     | 253                    | 1                      | 0.395                   | 141        | 5                      | 0                      | 0                       |
| 102                     | 81                     | 0                      | 0                       | 142        | 75                     | 0                      | 0                       |
| 103                     | 427                    | 1                      | 0.234                   | 143        | 381                    | 1                      | 0.262                   |
| 104                     | 9158                   | 3                      | 0.033                   | 144        | 34                     | 0                      | 0                       |
| 105                     | 44                     | 1                      | 2.273                   | 145        | 44                     | 0                      | 0                       |
| 106                     | 693                    | 15                     | 2.345                   | 146        | 3                      | 1                      | 33.33                   |
| 107                     | 312                    | 0                      | 0                       | 147        | 197                    | 0                      | 0                       |
| 108                     | 1350                   | 2                      | 0.148                   | 148        | 27                     | 2                      | 7.407                   |

| Continuation of Table 1 |                        |                        |                         |            |                        |                        |                         |
|-------------------------|------------------------|------------------------|-------------------------|------------|------------------------|------------------------|-------------------------|
| position #              | # of Mutations (world) | # of Mutations (India) | % of occurrence (India) | position # | # of Mutations (world) | # of Mutations (India) | % of occurrence (India) |
| 149                     | 154                    | 1                      | 0.650                   | 189        | 109                    | 2                      | 1.835                   |
| 150                     | 55                     | 0                      | 0                       | 190        | 33                     | 0                      | 0                       |
| 151                     | 3111                   | 3                      | 0.096                   | 191        | 78                     | 0                      | 0                       |
| 152                     | 58                     | 1                      | 1.724                   | 192        | 39                     | 0                      | 0                       |
| 153                     | 96                     | 0                      | 0                       | 193        | 461                    | 0                      | 0                       |
| 154                     | 82                     | 0                      | 0                       | 194        | 21                     | 0                      | 0                       |
| 155                     | 2261                   | 33                     | 1.460                   | 195        | 127                    | 0                      | 0                       |
| 156                     | 23                     | 0                      | 0                       | 196        | 857                    | 0                      | 0                       |
| 157                     | 1                      | 0                      | 0                       | 197        | 51                     | 0                      | 0                       |
| 158                     | 134                    | 0                      | 0                       | 198        | 136                    | 0                      | 0                       |
| 159                     | 209                    | 0                      | 0                       | 199        | 28                     | 0                      | 0                       |
| 160                     | 6                      | 0                      | 0                       | 200        | 34                     | 0                      | 0                       |
| 161                     | 6                      | 0                      | 0                       | 201        | 68                     | 0                      | 0                       |
| 162                     | 113                    | 2                      | 1.770                   | 202        | 829                    | 0                      | 0                       |
| 163                     | 162                    | 0                      | 0                       | 203        | 5                      | 0                      | 0                       |
| 164                     | 7                      | 0                      | 0                       | 204        | 30                     | 0                      | 0                       |
| 165                     | 248                    | 0                      | 0                       | 205        | 31                     | 0                      | 0                       |
| 166                     | 974                    | 3                      | 0.308                   | 206        | 27                     | 0                      | 0                       |
| 167                     | 8                      | 1                      | 12.5                    | 207        | 188                    | 0                      | 0                       |
| 168                     | 35                     | 0                      | 0                       | 208        | 15                     | 0                      | 0                       |
| 169                     | 33                     | 0                      | 0                       | 209        | 55                     | 0                      | 0                       |
| 170                     | 18                     | 0                      | 0                       | 210        | 484                    | 2                      | 0.413                   |
| 171                     | 3147                   | 12                     | 0.381                   | 211        | 51                     | 0                      | 0                       |
| 172                     | 51165                  | 5                      | 0.010                   | 212        | 0                      | 0                      | -                       |
| 173                     | 331                    | 6                      | 1.813                   | 213        | 346                    | 0                      | 0                       |
| 174                     | 2482                   | 3                      | 0.121                   | 214        | 1                      | 0                      | 0                       |
| 175                     | 1519                   | 2                      | 0.132                   | 215        | 6                      | 0                      | 0                       |
| 176                     | 407                    | 0                      | 0                       | 216        | 67                     | 0                      | 0                       |
| 177                     | 222                    | 1                      | 0.450                   | 217        | 351                    | 0                      | 0                       |
| 178                     | 26                     | 0                      | 0                       | 218        | 90                     | 0                      | 0                       |
| 179                     | 41                     | 0                      | 0                       | 219        | 290                    | 0                      | 0                       |
| 180                     | 2355                   | 1                      | 0.042                   | 220        | 123                    | 1                      | 0.813                   |
| 181                     | 114                    | 0                      | 0                       | 221        | 106                    | 0                      | 0                       |
| 182                     | 158                    | 10                     | 6.329                   | 222        | 114                    | 0                      | 0                       |
| 183                     | 551                    | 0                      | 0                       | 223        | 5066                   | 37                     | 0.730                   |
| 184                     | 66                     | 0                      | 0                       | 224        | 2346                   | 7                      | 0.298                   |
| 185                     | 708                    | 0                      | 0                       | 225        | 1107                   | 0                      | 0                       |
| 186                     | 153                    | 0                      | -                       | 226        | 661                    | 1                      | 0.151                   |
| 187                     | 49                     | 0                      | 0                       | 227        | 90                     | 1                      | 1.111                   |
| 188                     | 2581                   | 0                      | 0                       | 228        | 38                     | 0                      | 0                       |

| Continuation of Table 1 |                        |                        |                         |            |                        |                        |                         |
|-------------------------|------------------------|------------------------|-------------------------|------------|------------------------|------------------------|-------------------------|
| position #              | # of Mutations (world) | # of Mutations (India) | % of occurrence (India) | position # | # of Mutations (world) | # of Mutations (India) | % of occurrence (India) |
| 229                     | 368                    | 0                      | 0                       | 255        | 86                     | 0                      | 0                       |
| 230                     | 75                     | 0                      | 0                       | 256        | 310                    | 0                      | 0                       |
| 231                     | 22                     | 0                      | 0                       | 257        | 725                    | 1                      | 0.138                   |
| 232                     | 60                     | 0                      | 0                       | 258        | 103                    | 0                      | 0                       |
| 233                     | 4                      | 0                      | 0                       | 259        | 240                    | 0                      | 0                       |
| 234                     | 19                     | 0                      | 0                       | 260        | 330                    | 0                      | 0                       |
| 235                     | 63                     | 0                      | 0                       | 261        | 92                     | 0                      | 0                       |
| 236                     | 828                    | 0                      | 0                       | 262        | 448                    | 2                      | 0.446                   |
| 237                     | 87                     | 0                      | 0                       | 263        | 50                     | 3                      | 6                       |
| 238                     | 260                    | 3                      | 1.154                   | 264        | 99                     | 0                      | 0                       |
| 239                     | 3536                   | 2                      | 0.056                   | 265        | 62                     | 0                      | 0                       |
| 240                     | 7589                   | 3                      | 0.040                   | 266        | 63                     | 1                      | 1.587                   |
| 241                     | 312                    | 1                      | 1.111                   | 267        | 784                    | 0                      | 0                       |
| 242                     | 60                     | 0                      | 0                       | 268        | 362                    | 1                      | 0.276                   |
| 243                     | 15                     | 1                      | 6.667                   | 269        | 455                    | 0                      | 0                       |
| 244                     | 32                     | 0                      | 0                       | 270        | 457                    | 0                      | 0                       |
| 245                     | 66                     | 1                      | 1.515                   | 271        | 64                     | 0                      | 0                       |
| 246                     | 49                     | 0                      | 0                       | 272        | 112                    | 0                      | 0                       |
| 247                     | 70                     | 0                      | 0                       | 273        | 102                    | 0                      | 0                       |
| 248                     | 7                      | 0                      | 0                       | 274        | 18                     | 1                      | 5.556                   |
| 249                     | 3                      | 0                      | 0                       | 275        | 213                    | 3                      | 1.408                   |
| 250                     | 6                      | 1                      | 16.667                  | -          | -                      | -                      | -                       |
| 251                     | 674                    | 0                      | 0                       | -          | -                      | -                      | -                       |
| 252                     | 147                    | 0                      | 0                       | -          | -                      | -                      | -                       |
| 253                     | 15954                  | 0                      | 0                       | -          | -                      | -                      | -                       |
| 254                     | 748                    | 0                      | 0                       | -          | -                      | -                      | -                       |
| End of Table            |                        |                        |                         |            |                        |                        |                         |

Table S2: The list of residues forming hydrogen bonds showing maximum occupancy in the three systems are shown. Main and side indicate main chain and side chain hydrogen bonds.

| Residue1     | Residue2     | Occupancy     |
|--------------|--------------|---------------|
| TYR156'-Side | LYS192'-Main | 71.93%±0.0019 |
| ARG134'-Side | ASP155'-Side | 70.1%±0.0084  |
| SER205'-Side | ASN144'-Main | 67.99%±0.0022 |
| LEU203-Main  | ASP210-Main  | 68.28%±0.0013 |
| SER205-Side  | ASN144-Main  | 67.86%±0.0020 |
| LEU203'-Main | ASP210'-Main | 67.97%±0.0010 |
| TYR154-Side  | GLU191-Side  | 61.90%±0.0005 |
| THR89'-Side  | LEU85'-Main  | 61.75%±0.0011 |
| THR89-Side   | LEU85-Main   | 60.97%±0.0021 |
| THR175'-Side | ASP173'-Side | 61.7%±0.0036  |

(a) WT

| Residue1     | Residue2     | Occupancy     |
|--------------|--------------|---------------|
| TYR212'-Side | THR164'-Main | 68.44%±0.0129 |
| SER205'-Side | ASN144'-Main | 69.27%±0.0022 |
| SER205-Side  | ASN144-Main  | 68.99%±0.0014 |
| TYR233'-Side | LYS198'-Main | 66.44%±0.0006 |
| LEU203-Main  | ASP210-Main  | 66.20%±0.0035 |
| TYR233-Side  | LYS198-Main  | 66.44%±0.0035 |
| LEU203'-Main | ASP210'-Main | 66.86%±0.0013 |
| THR89'-Side  | LEU85'-Main  | 63.12%±0.0021 |
| TYR233-Main  | ILE167-Main  | 59.67%±0.0077 |
| THR89-Side   | LEU85-Main   | 61.11%±0.0005 |

(b) D155Y

| Residue1     | Residue2     | Occupancy     |
|--------------|--------------|---------------|
| LEU203-Main  | ASP210-Main  | 64.48%±0.0074 |
| LEU203'-Main | ASP210'-Main | 63.23%±0.0018 |
| THR89-Side   | LEU85'-Main  | 63.37%±0.0068 |
| TYR233'-Side | LYS198'-Main | 61.92%±0.0121 |
| TYR91-Side   | PRO42-Main   | 55.81%±0.0182 |
| SER58'-Side  | ALA54'-Main  | 62.31%±0.0085 |
| THR89-Side   | LEU85-Main   | 59.91%±0.0088 |
| TYR154'-Side | GLU191'-Side | 60.33%±0.0072 |
| TYR233-Side  | LYS198-Main  | 59.93%±0.0011 |
| SER58-Side   | ALA54-Main   | 61.28%±0.0027 |

(c) S171L

Table S3: List of salt bridge interactions in the three systems

| Salt Bridge     | WT | D155Y | S171L | Salt Bridge     | WT | D155Y | S171L |
|-----------------|----|-------|-------|-----------------|----|-------|-------|
| ASP142-LYS61'   | ✓  | ✓     | ✓     | ASP199-LYS198   | ✗  | ✓     | ✓     |
| ASP142-LYS75    | ✓  | ✓     | ✓     | ASP199'-LYS198' | ✓  | ✓     | ✓     |
| ASP142-ARG116   | ✓  | ✗     | ✗     | ASP210-LYS235   | ✓  | ✓     | ✓     |
| ASP142-ARG122   | ✗  | ✓     | ✓     | ASP210'-LYS235' | ✓  | ✓     | ✓     |
| ASP142-ARG126   | ✗  | ✓     | ✓     | ASP238-LYS235   | ✓  | ✓     | ✓     |
| ASP142'-LYS61   | ✓  | ✓     | ✓     | ASP238'-LYS235' | ✓  | ✓     | ✓     |
| ASP142'-ARG122' | ✓  | ✗     | ✓     | GLU181-LYS192   | ✓  | ✓     | ✓     |
| ASP142'-LYS61'  | ✓  | ✗     | ✗     | GLU181-LYS67    | ✗  | ✗     | ✓     |
| ASP142'-LYS75'  | ✓  | ✓     | ✓     | GLU181-ARG67    | ✗  | ✗     | ✓     |
| ASP142'-ARG116' | ✓  | ✗     | ✗     | GLU181'-LYS192' | ✓  | ✓     | ✓     |
| ASP142'-LYS75   | ✓  | ✗     | ✓     | GLU181'-LYS266  | ✓  | ✗     | ✗     |
| ASP142'-ARG126' | ✗  | ✓     | ✓     | GLU191-ARG68    | ✓  | ✓     | ✓     |
| ASP155-ARG134   | ✓  | ✗     | ✓     | GLU191-LYS192   | ✗  | ✗     | ✓     |
| ASP155'-ARG134' | ✓  | ✗     | ✓     | GLU191'-LYS192' | ✓  | ✗     | ✗     |
| ASP181'-LYS192' | ✗  | ✓     | ✗     | GLU191'-ARG68'  | ✓  | ✓     | ✓     |
| ASP183-LYS192   | ✓  | ✓     | ✓     | GLU194-LYS192   | ✓  | ✓     | ✓     |
| ASP183-LYS67    | ✓  | ✓     | ✓     | GLU194-LYS198   | ✗  | ✗     | ✓     |
| ASP183-ARG68    | ✓  | ✗     | ✓     | GLU194'-LYS192' | ✓  | ✓     | ✓     |
| ASP183'-LYS67'  | ✓  | ✗     | ✗     | GLU226-LYS235'  | ✓  | ✗     | ✗     |
| ASP183'-LYS192' | ✗  | ✗     | ✓     | GLU226'-LYS23   | ✓  | ✗     | ✗     |
| ASP199-LYS1     | ✓  | ✗     | ✗     | GLU226'-LYS235  | ✗  | ✓     | ✓     |

Table S4: List of residues constituting each cluster for WT and the two mutants. The functional domain in which some of the constituent residues fall are indicated within parentheses.

| Beginning of the table                                                                                                                                                                                                                                                                                                                                        |                                                                                                                                                                                                          |                                                                                                                                                                                                                                                                                                       |
|---------------------------------------------------------------------------------------------------------------------------------------------------------------------------------------------------------------------------------------------------------------------------------------------------------------------------------------------------------------|----------------------------------------------------------------------------------------------------------------------------------------------------------------------------------------------------------|-------------------------------------------------------------------------------------------------------------------------------------------------------------------------------------------------------------------------------------------------------------------------------------------------------|
| WT                                                                                                                                                                                                                                                                                                                                                            | D155Y                                                                                                                                                                                                    | S171L                                                                                                                                                                                                                                                                                                 |
| 0: ALA51 ALA54 ALA59<br>GLN57 GLY49 GLY44<br>ILE47 LEU52 LEU53<br>LEU41 LEU46 PHE56<br>PHE43 PRO42 SER40<br>SER58 SER60 TRP45<br>VAL50 VAL55 VAL48                                                                                                                                                                                                            | 0: ALA51 ALA54 ALA59<br>GLN57 GLY49 GLY44<br>ILE62 ILE47 LEU52<br>LEU53 LEU41 LEU46<br>LYS61 PHE56 PHE43<br>PRO42 SER40 SER58<br>SER60 TRP45 VAL50<br>VAL55 VAL48                                        | 0: ALA51 ALA54 ALA59<br>ASN82 CYS81 GLN57<br>GLY49 GLY76 GLY44<br>HIE78 HIE93 ILE47<br>LEU52 LEU53 LEU41<br>LEU83 LEU84 LEU85<br>LEU86 LEU94 LEU95<br>LEU46 LYS75 PHE56<br>PHE43 PHE79 PHE87<br>PRO42 SER40 SER58<br>SER60 SER92 THR89<br>TRP45 TYR91 VAL50<br>VAL55 VAL77 VAL80<br>VAL88 VAL90 VAL48 |
| 1: ALA51' ALA54' ALA59'<br>ASN82' CYS81' GLN57'<br>GLY44' GLY49' GLY76'<br>HIE78' HIE93' ILE47'<br>LEU41' LEU46' LEU52'<br>LEU53' LEU83' LEU84'<br>LEU85' LEU86' LEU94'<br>LEU95' LYS75' PHE43'<br>PHE56' PHE79' PHE87'<br>PRO42' SER40' SER58'<br>SER60' SER92' THR89'<br>TRP45' TYR91' VAL48'<br>VAL50' VAL55' VAL77'<br>VAL80' VAL88' VAL90'<br>(Domain 3) | 1: ALA98 ALA99 ASN82<br>CYS81 GLY76 GLY100<br>HIE78 HIE93 LEU83<br>LEU84 LEU85 LEU86<br>LEU94 LEU95 LEU96<br>LYS75 PHE79 PHE87<br>SER92 THR89 TYR91<br>VAL77 VAL80 VAL88<br>VAL90 VAL97 (Domain 3)       | 1: ALA51' ALA52' ALA59'<br>GLN57' GLY44' GLY49'<br>ILE47' ILE62' LEU41'<br>LEU46' LEU52' LEU53'<br>LYS61' PHE43' PHE56'<br>PRO42' SER40' SER58'<br>SER60' TRP45' VAL48'<br>VAL50' VAL55'<br>VAL50' VAL55'                                                                                             |
| 2: ASN82 CYS81 GLY76<br>HIE78 HIE93 LEU83<br>LEU84 LEU85 LEU86<br>LEU94 LEU95 LYS75<br>PHE79 PHE87 SER92<br>THR89 TYR91 VAL77<br>VAL80 VAL88 VAL90                                                                                                                                                                                                            | 2: ALA51' ALA54' ALA59'<br>GLN57' GLY44' GLY49'<br>ILE47' ILE62' ILE63'<br>LEU41' LEU44' LEU52<br>LEU53' LYS61' PHE43'<br>PHE56' PRO42' SER40'<br>SER58' SER60' THR64'<br>TRP45' VAL48' VAL50'<br>VAL55' | 2: ALA62' ARG68' ASN82'<br>CYS81' GLN70' GLY76'<br>HIE78' HIE93' ILE63'<br>LEU65' LEU71' LEU83<br>LEU84' LEU85' LEU86'<br>LEU94' LEU95' LYS66'<br>LYS67' LYS75' PHE79'<br>PHE87' SER74' SER92'<br>THR64' THR89' TRP69'<br>TYR91' VAL77' VAL80'<br>VAL88' VAL90'                                       |

| Continuation of Table S4                                                                                                                                                                                                                                                                                               |                                                                                                                                                                                                                                                                                         |                                                                                                                                                                                                                                                                                                                                     |
|------------------------------------------------------------------------------------------------------------------------------------------------------------------------------------------------------------------------------------------------------------------------------------------------------------------------|-----------------------------------------------------------------------------------------------------------------------------------------------------------------------------------------------------------------------------------------------------------------------------------------|-------------------------------------------------------------------------------------------------------------------------------------------------------------------------------------------------------------------------------------------------------------------------------------------------------------------------------------|
| WT                                                                                                                                                                                                                                                                                                                     | D155Y                                                                                                                                                                                                                                                                                   | S171L                                                                                                                                                                                                                                                                                                                               |
| 3: ALA88 ALA99 ALA103<br>ALA110 ARG122 ASN119<br>GLN116 GLU102 GLY100<br>ILE118 ILE123 ILE124<br>LEU96 LEU101 LEU106<br>LEU108 LEU111 LEU115<br>MET125 PHE105 PHE114<br>PHE120 PRO104 SER117<br>TYR107 TYR109 TYR113<br>VAL97 VAL112 VAL121<br>(Domain 3)                                                              | 3: ALA98' ALA99' ALA103'<br>ALA110' ARG122' ASN119'<br>GLN116' GLU102' GLY100'<br>ILE118' ILE123' ILE124'<br>LEU96' LEU101' LEU106'<br>LEU108' LEU111' LEU115'<br>MET125' PHE105' PHE114'<br>PHE120' PRO104' SER117'<br>TYR107' TYR109' TYR113'<br>VAL97' VAL112' VAL121'<br>(Domain 3) | 3: ALA98' ALA99' ALA103'<br>ALA110' ARG122' ASN119'<br>GLN116' GLU102' GLY100'<br>ILE118' ILE123' ILE124'<br>LEU96' LEU101' LEU106'<br>LEU108' LEU109' LEU115'<br>MET125' PHE105' PHE114'<br>PHE120' PRO104' SER117'<br>TYR107' TYR109' TYR113'<br>VAL97' VAL112' VAL121'<br>(Domain 3)                                             |
| 4: ALA88' ALA99' ALA103'<br>ALA110' GLN106' GLU102'<br>GLY100' LEU96' LEU101'<br>LEU106' LEU108' LEU111'<br>LEU115' PHE105' PHE114'<br>PRO104' SER117' TYR107'<br>TYR109' TYR113' VAL97'<br>VAL112' (Domain 3)                                                                                                         | 4: ALA72' ARG68' ASN82'<br>CYS81' GLN70' GLY76'<br>HIE78' HIE93' LEU65'<br>LEU71' LEU73' LEU83'<br>LEU84' LEU85' LEU86'<br>LEU94' LEU95' LYS66'<br>LYS67' LYS75' PHE79'<br>PHE87' SER74' SER92'<br>THR89' TRP69' TYR91'<br>VAL77' VAL80' VAL88'<br>VAL90' (Domain 3)                    | 4: ALA98 ALA99 ALA103<br>ALA110 ASN119 GLN116<br>GLU102 GLY100 ILE118<br>LEU96 LEU101 LEU101'<br>LEU108 LEU111 LEU115<br>PHE105 PHE114 PHE120<br>PRO104 SER117 TYR107<br>TYR109 TYR113 VAL97<br>VAL112 VAL121 (Domain 3)                                                                                                            |
| 5: ALA72 ARG68 GLN70<br>ILE62 ILE63 LEU65<br>LEU71 LEU73 LYS61<br>LYS66 LYS67 SER74<br>THR64 TRP69                                                                                                                                                                                                                     | 5: ALA103 ALA11 ARG122<br>ASN119 GLN116 GLU102<br>ILE118 ILE123 ILE124<br>LEU101 LEU106 LEU108<br>LEU111 LEU115 MET125<br>PHE105 PHE114 PHE120<br>PRO104 SER117 TYR107<br>TYR109 TYR113 VAL112<br>VAL121 (Domain 3)                                                                     | 5: ALA72 ARG68 GLN70<br>ILE62 ILE63 LEU65 LEU71<br>LEU73 LYS61 LYS66<br>LYS67 SER74 THR64<br>TRP69                                                                                                                                                                                                                                  |
| 6: ARG122' ARG126' ASN119'<br>ASN119' ASP199' ASP210'<br>ASP238' CYS130' CYS133'<br>CYS200' HIE204' ILE118'<br>ILE123' ILE124' ILE236'<br>LYS132' LYS198' LYS235'<br>MET125' PHE120' PHE207'<br>SER205' SER209' THR208'<br>TRP127' TRP131' TYR206'<br>TYR211' TYR212' VAL121'<br>VAL200' VAL202' VAL237'<br>(Domain 3) | 6: ALA72 ARG68 GLN70<br>ILE63 LEU65 LEU71<br>LEU73 LYS66 LYS67<br>SER74 THR64 TRP69                                                                                                                                                                                                     | 6: ALA143' ARG126' ARG134'<br>ASN137' ASN144' ASN152'<br>ASP142' ASP155' ASP199'<br>ASP210' ASP238' CYS130'<br>CYS133' CYS148' CYS153'<br>CYS157' CYS200' HIE150'<br>HIE204' ILE158' ILE236'<br>LEU127' LEU129' LEU139'<br>LEU140' LEU147' LEU203'<br>LYS132' LYS136' LYS198'<br>LYS235' PHE146' PHE207'<br>PRO138' SER135' SER205' |



| Continuation of Table S4                                                                                                                                                                                                                                                                                                                         |                                                                                                                                                                                                                                                                                                                                                                                                                                                                                                                                                                                  |                                                                                                                                                                                                                                                                                                                                                                                           |
|--------------------------------------------------------------------------------------------------------------------------------------------------------------------------------------------------------------------------------------------------------------------------------------------------------------------------------------------------|----------------------------------------------------------------------------------------------------------------------------------------------------------------------------------------------------------------------------------------------------------------------------------------------------------------------------------------------------------------------------------------------------------------------------------------------------------------------------------------------------------------------------------------------------------------------------------|-------------------------------------------------------------------------------------------------------------------------------------------------------------------------------------------------------------------------------------------------------------------------------------------------------------------------------------------------------------------------------------------|
| WT                                                                                                                                                                                                                                                                                                                                               | D155Y                                                                                                                                                                                                                                                                                                                                                                                                                                                                                                                                                                            | S171L                                                                                                                                                                                                                                                                                                                                                                                     |
|                                                                                                                                                                                                                                                                                                                                                  |                                                                                                                                                                                                                                                                                                                                                                                                                                                                                                                                                                                  | SER209' THR151' THR208<br>TRP128' TRP131' TRP149'<br>TYR141' TYR145' TYR154<br>TYR156' TYR206' TYR211'<br>TYR212' VAL201' VAL202'<br>VAL237' (Domain 4)                                                                                                                                                                                                                                   |
| 7: ALA72' ARG68' GLN70'<br>ILE62' ILE63' LEU65'<br>LEU71' LEU73' LYS61'<br>LEU71' LEU73' LYS61'<br>LYS66' LYS67' SER74'<br>THR64' TRP69'                                                                                                                                                                                                         | 7: ALA143' ARG126' ARG134'<br>ASN137' ASN144' ASN152'<br>ASN161' ASP142' ASP199'<br>ASP210' ASP238' CYS130'<br>CYS133' CYS148' CYS153'<br>CYS157' CYS200' HIE150'<br>HIE204' ILE158' ILE236'<br>LEU127' LEU129' LEU139'<br>LEU140' LEU147' LEU203'<br>LYS142' LYS146' LYS198'<br>LYS235' PHE146' PHE207'<br>PRO138' PRO159' SER135'<br>SER162' SER165' SER166'<br>SER205' SER209' THR151'<br>THR164' THR208' TRP128'<br>TRP131' TRP149' TYR141'<br>TYR145' TYR154' TYR155'<br>TYR156' TYR160' TYR206'<br>TYR211' TYR212' VAL163'<br>VAL210' VAL202' VAL237'<br>(Domains 3, 4, 5) | 7: ASN161' ASN234' ASP222'<br>GLN213' GLN218' GLU226'<br>GLY224' HIE227' ILE167'<br>ILE169' ILE232' LEU214'<br>LEU219' PHE230' PHE231'<br>PRO159' SER162' SER165'<br>SER166' SER216' SER220'<br>THR164' THR170' THR217'<br>THR221' THR223' THR229'<br>TYR160' TYR215' TYR133'<br>VAL163' VAL168' VAL225'<br>VAL228' (Domain 5)                                                            |
| 8: ALA143' ARG134' ASN137'<br>ASN144' ASN152' ASN161'<br>ASP143' ASP155' CYS148'<br>CYS153' CYS157' HIE150'<br>ILE158' LEU139' LEU140'<br>LEU147' LYS136' PHE146'<br>PRO138' PRO159' SER135'<br>PRO138' PRO159' SER135'<br>SER162' SER165' SER166'<br>THR151' THR164' TRP149'<br>TYR141' TYR145' TYR154<br>TYR156' TYR160' VAL163'<br>(Domain 4) | 8: ALA143 ARG126 ARG134<br>ASN144 ASN152 ASN137<br>ASP142 ASP199 ASP210<br>ASP238 CYS148 CYS153<br>CYS157 CYS200 CYS130<br>CYS133 HIE150 HIE204<br>ILE158 ILE236 LEU139<br>LEU140 LEU147 LEU203<br>LEU127 LEU129 LYS198<br>LYS235 LYS132 LYS136<br>PHE146 PHE207 PRO138<br>SER205 SER209 SER135<br>THR151 THR208 TRP149<br>TRP128 TRP131 TYR141<br>TYR145 TYR154 TYR155<br>TYR156 TYR206 TYR211                                                                                                                                                                                  | 8: ALA143 ARG122 ARG126<br>ARG134 ASN144 ASN161<br>ASN137 ASP142 ASP210<br>ASP238 CYS130 CYS133<br>HIE204 ILE236 ILE123<br>ILE124 LEU139 LEU140<br>LEU203 LEU127 LEU129<br>LYS235 LYS132 LYS136<br>MET125 PHE146 PHE207<br>PRO159 PRO138 SER162<br>SER205 SER209 SER135<br>THR208 TRP128 TRP131<br>TYR141 TYR145 TYR160<br>TYR206 TYR211 TYR212<br>VAL201 VAL202 VAL237<br>(Domains 4, 5) |

| Continuation of Table S4                                                                                                                                                                                                                                                                                                                     |                                                                                                                                                                                                                                                                                                          |                                                                                                                                                                                                                                                  |
|----------------------------------------------------------------------------------------------------------------------------------------------------------------------------------------------------------------------------------------------------------------------------------------------------------------------------------------------|----------------------------------------------------------------------------------------------------------------------------------------------------------------------------------------------------------------------------------------------------------------------------------------------------------|--------------------------------------------------------------------------------------------------------------------------------------------------------------------------------------------------------------------------------------------------|
| WT                                                                                                                                                                                                                                                                                                                                           | D155Y                                                                                                                                                                                                                                                                                                    | S171L                                                                                                                                                                                                                                            |
|                                                                                                                                                                                                                                                                                                                                              | TYR212 VAL201 VAL202<br>VAL237 (Domains 3, 4)                                                                                                                                                                                                                                                            |                                                                                                                                                                                                                                                  |
| 9: ARG134 ASN152 ASP155<br>ASP173 ASP183 CYS148<br>CYS153 CYS157 GLN185<br>GLU181 GLU191 GLU194<br>GLY172 GLY174 GLY187<br>GLY188 GLY196 HIE182<br>HIE182 ILE158 ILE179<br>ILE186 LEU147 LYS192<br>PRO178 SER177 SER180<br>SER195 SER135 THR151<br>THR175 THR176 THR190<br>TRP149 TRP193 TYR154<br>TYR156 TYR184 TYR189<br>VAL197 (Domain 4) | 9: ASP173 ASP183 GLN185<br>GLU181 GLU191 GLU194<br>GLY172 GLY174 GLY187<br>GLY188 GLY196 HIE182<br>ILE179 ILE186 LYS192<br>PRO178 SER177 SER180<br>SER195 THR175 THR176<br>THR190 TRP193 TYR184<br>TYR189 VAL197 (Domain 6)                                                                              | 9: ASP173 ASP183 GLN185<br>GLU181 GLU191 GLY172<br>GLY174 GLY187 GLY188<br>HIE182 ILE179 ILE176<br>LEU171 PRO178 SER177<br>SER180 THR175 THR176<br>THR190 TYR184 TYR189<br>(Domain 6)                                                            |
| 10: ARG126 ASN137 ASP152<br>CYS130 CYS133 LEU139<br>LEU140 LEU127 LEU129<br>LYS132 LYS136 PRO138<br>TRP128 TRP131 TYR141<br>(Domain 4)                                                                                                                                                                                                       | 10: ASN161 ASN234 ASP222<br>GLN213 GLN218 GLU226<br>GLY224 HIE227 ILE167<br>ILE169 ILE232 LEU214<br>LEU219 PHE230 PHE231<br>PRO159 SER162 SER165<br>SER166 SER171 SER216<br>SER220 THR164 THR170<br>THR217 THR221 THR223<br>THR229 TYR160 TYR215<br>TYR233 VAL163 VAL168<br>VAL225 VAL228 (Domains 5, 6) | 10: ASN152 ASP155 ASP199<br>CYS148 CYS153 CYS157<br>CYS200 GLU194 GLY196<br>HIE150 ILE158 LEU147<br>LYS192 LYS198 SER195<br>THR151 TRP149 TRP193<br>TYR154 TYR156 VAL197                                                                         |
| 11: ASN234 ASP222 GLN213<br>GLN218 GLU226 GLY224<br>HIE227 ILE167 ILE169<br>ILE232 LEU214 LEU219<br>PHE230 PHE231 SER171<br>SER216 SER220 THR170<br>THR217 THR221 THR223<br>THR229 TYR215 TYR233<br>VAL168 VAL225 VAL228                                                                                                                     | 11: ASP173' ASP183' GLN185'<br>GLU181' GLU191' GLU194'<br>GLY172' GLY174' GLY187'<br>GLY188' GLY196' HIE182'<br>ILE179' ILE186' LYS192'<br>PRO178' SER177' SER180'<br>SER195' THR175' THR176'<br>THR190' TRP193' TYR184'<br>TYR189' VAL197' (Domain 6)                                                   | 11: ASN234 ASP222 GLN213<br>GLN218 GLU226 GLY224<br>HIE227 ILE167 ILE169<br>ILE232 LEU214 LEU219<br>PHE230 PHE231 SER165<br>SER166 SER216 SER220<br>THR164 THR170 THR217<br>THR221 THR223 THR229<br>TYR215 TYR233 VAL163<br>VAL168 VAL225 VAL228 |
| 12: ALA143 ASN144 ASN161<br>ASP199 ASP210 ASP238<br>CYS200 HIE204 ILE237<br>LEU203 LYS198 LYS235<br>PHE146 PHE207 PRO159                                                                                                                                                                                                                     | 12: ASN234' ASP222' GLN213'<br>GLN218' GLU226' GLY224'<br>HIE227' ILE167' ILE169'<br>ILE242' LEU214' LEU219<br>PHE230' PHE231' SER171'                                                                                                                                                                   | 12: ASP173' ASP183' GLN185'<br>GLU181' GLU191' GLU194'<br>GLY172' GLY174' GLY187'<br>GLY188' GLY196' HIE182'<br>ILE179' ILE186' LEU171'                                                                                                          |

| Continuation of Table S4                                                                                                                                                                                                                                          |                                                                                                          |                                                                                                                        |
|-------------------------------------------------------------------------------------------------------------------------------------------------------------------------------------------------------------------------------------------------------------------|----------------------------------------------------------------------------------------------------------|------------------------------------------------------------------------------------------------------------------------|
| WT                                                                                                                                                                                                                                                                | D155Y                                                                                                    | S171L                                                                                                                  |
| SER162 SER165 SER166<br>SER205 SER209 THR164<br>THR208 TYR145 TYR160<br>TYR206 TYR211 TYR212<br>VAL163 VAL201 VAL202<br>VAL237 (Domains 4, 5)                                                                                                                     | SER216' SER220' THR170'<br>THR217' THR221' THR223'<br>THR229' TYR215' TYR233'<br>VAL168' VAL225' VAL228' | LYS192' PRO178' SER177'<br>SER180' SER195' THR175'<br>THR176' THR190' TRP193'<br>TYR184' TYR189' VAL197'<br>(Domain 6) |
| 13: ASP173' ASP183' GLN185'<br>GLU181' GLU191' GLU194'<br>GLY172' GLY174' GLY187'<br>GLY188' GLY196' HIE182'<br>ILE179' ILE186' LYS192'<br>PRO178' SER177' SER180'<br>SER195' THR175' THR176'<br>THR190' TRP193' TYR194'<br>TYR189' VAL197'<br>(Domain 6)         |                                                                                                          |                                                                                                                        |
| 14: ASN234' ASP222' GLN213'<br>GLN218' GLU226' GLY224'<br>HIE227' ILE167' ILE169'<br>ILE242' LEU214' LEU219'<br>PHE230' PHE231' SER171'<br>SER216' SER220' THR170'<br>THR217' THR221' THR223'<br>THR229' TYR215' TYR233'<br>VAL168' VAL225' VAL228'<br>(Domain 6) |                                                                                                          |                                                                                                                        |
| End of Table                                                                                                                                                                                                                                                      |                                                                                                          |                                                                                                                        |

Table S5: **Rearrangement of constituent interactome clusters.** Every coloured box denotes a range of residues residing in the same cluster. Red bordered rectangles show how some of the residue sequences (coloured boxes) have merged in different combinations to form larger clusters due to increased strength of interactions between them.

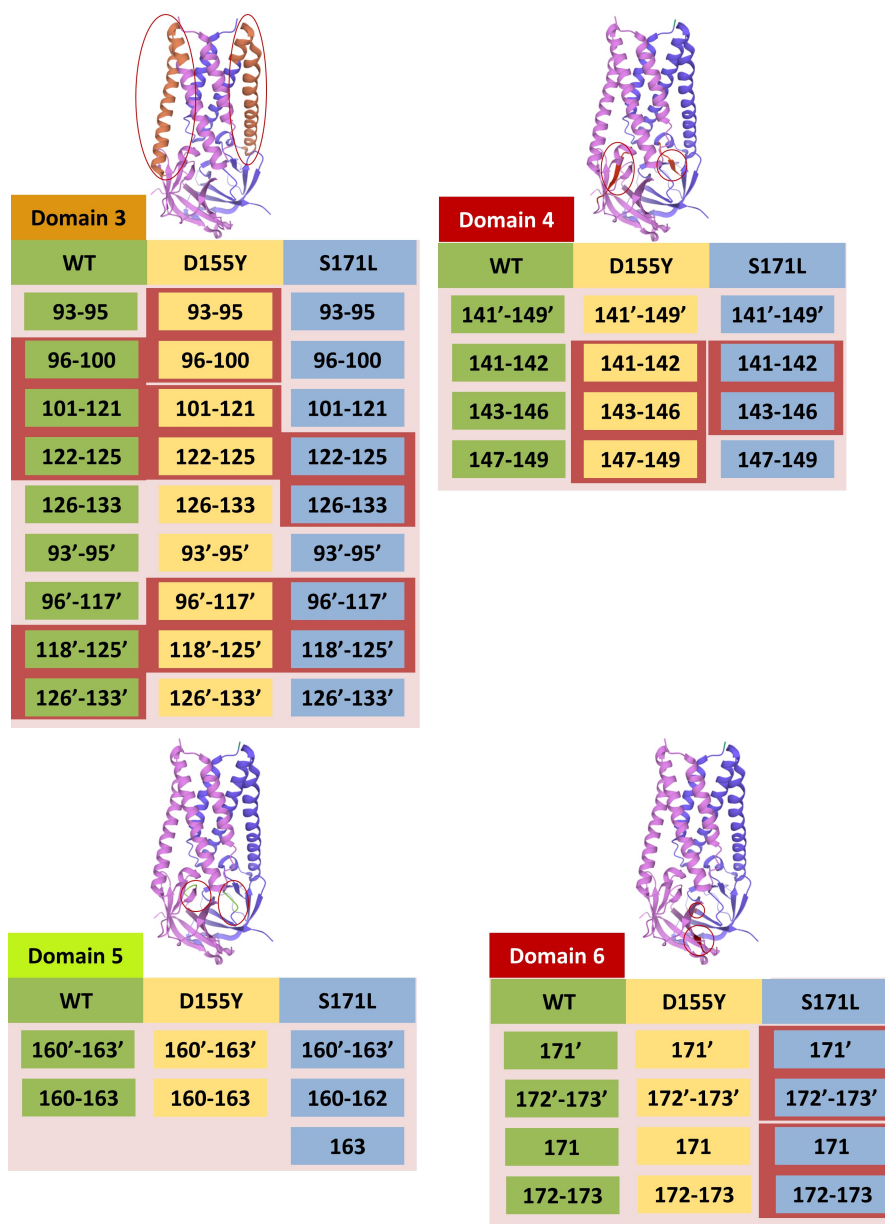

Table S6: The list of PROVEAN scores of selected mutations of ORF3A.

| Amino acid Substitution in ORF3a | PROVEAN score* | Variation effect on protein |
|----------------------------------|----------------|-----------------------------|
| Q57H                             | -3.286         | Deleterious                 |
| W131C                            | -7.752         | Deleterious                 |
| W131R                            | -9.067         | Deleterious                 |
| D155Y                            | -6.829         | Deleterious                 |
| S171L                            | -2.238         | Neutral                     |
| G172C                            | -6.752         | Deleterious                 |
| G172V                            | -6.762         | Deleterious                 |

\* Cutoff value = -2.5

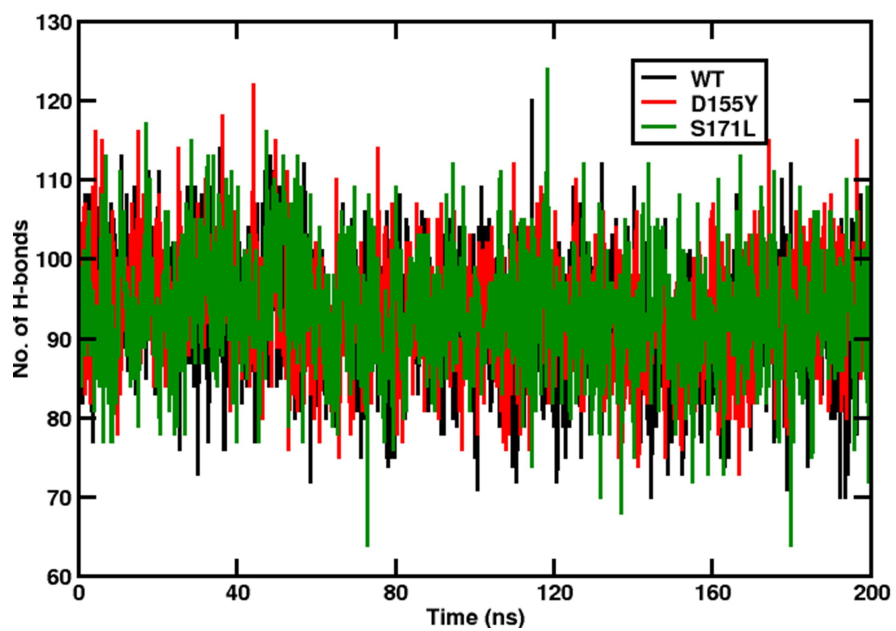

Fig.S1 The time evolution of hydrogen bonds for WT, D155Y and S171L are shown in black, red and green respectively

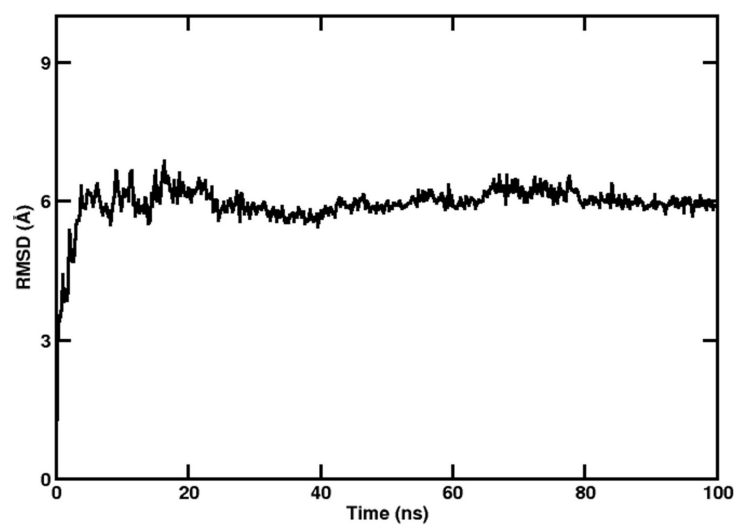

(a)

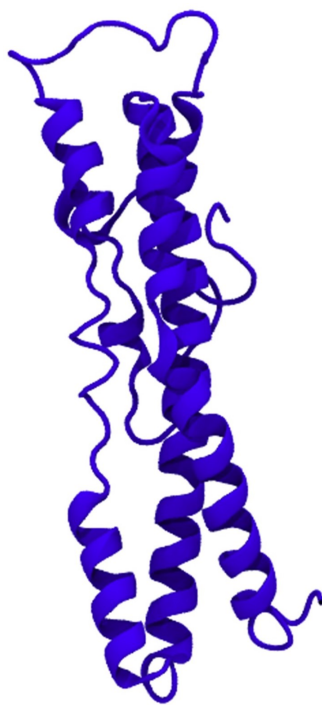

(b)

Fig. S2 (a) RMSD of the simulation of apo-caveolin-1 (b) Average structure of Caveolin-1 generated from simulation

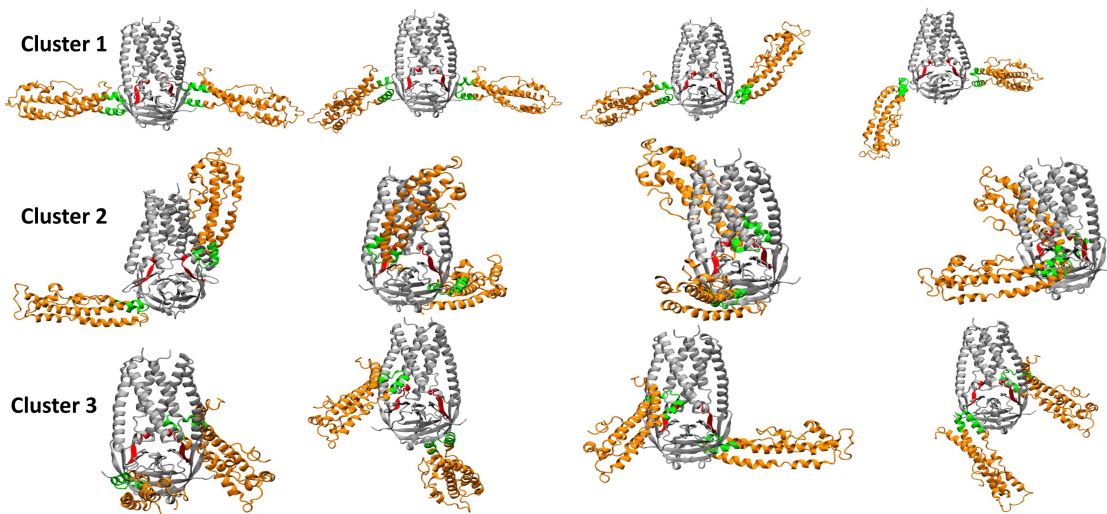

Fig. S3 The probable complexes generated from Haddock

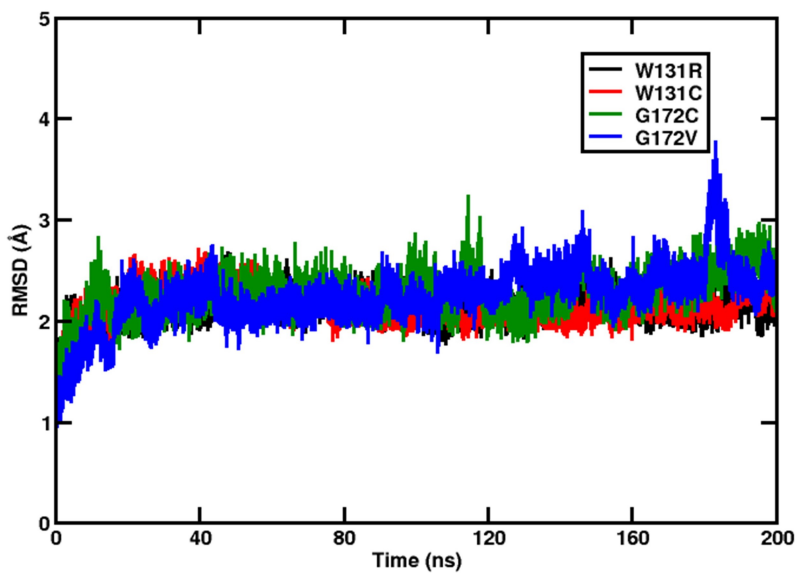

Fig. S4 The time evolution of RMSD of the four other mutants of ORF3a studied



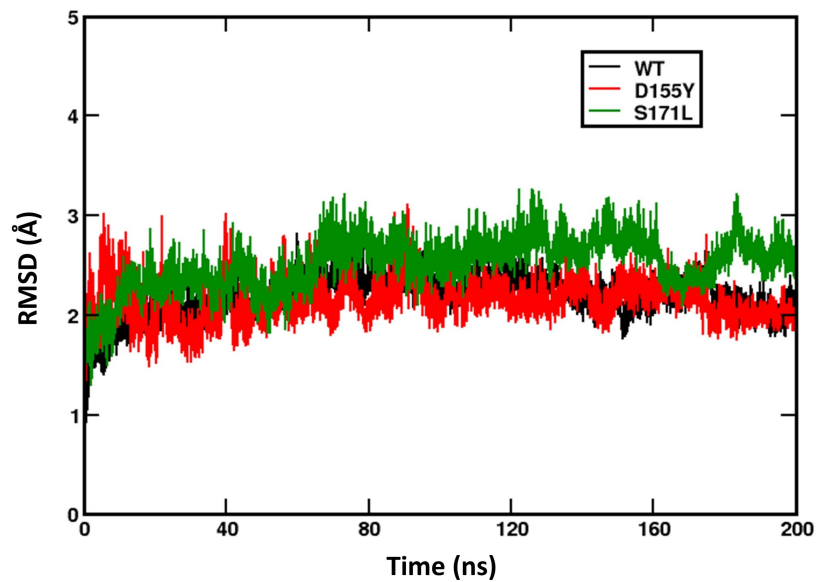

Fig. S5 The time evolution of the RMSD of the ORF3a protein with respect to the starting structure, obtained from the second production run

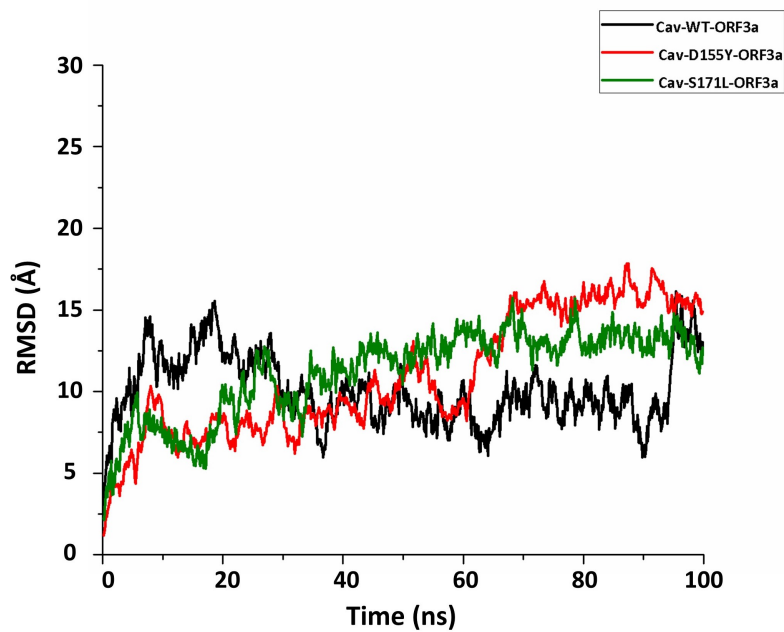

Fig. S6 Stability of the ORF3a-caveolin-1 complex, obtained from the second production run

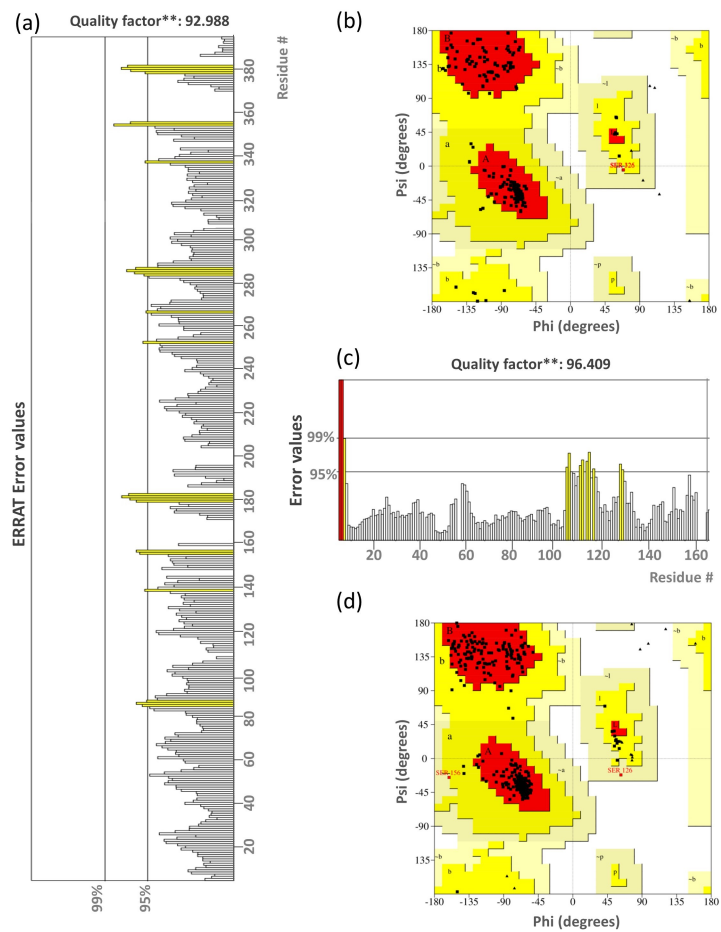

Fig. S7 The ERRAT analysis and Ramachandran Plot of ORF3a
